# Supplementary material
Source: Springer Nature journal article supplement (https://www.springermedizin.de/resource/supplementary/12913_2009_936_MOESM2_ESM.pdf/9536502)
Supplement: MOESM2 [file 9536502]

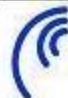

Safety 4 patients

## Diagnostic process dyspnea patients

Date: ..... Time: .....

Name physician: .....

Patient number: .....

Date of admission: .....

Possible diagnosis for this patient:

1. ....

2. ....

3. ....

4. ....

5. ....

Likelihood of above mentioned diagnosis. Please note down the numbers of the diagnosis on this line

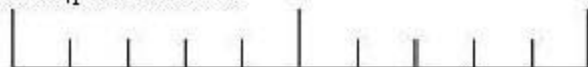

Not Likely

Most Likely

Please indicate your experienced workload during diagnosing the patient:

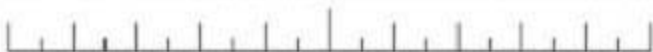

Low

High
